# Supplementary material
Source: PubMed Central journal article supplement (PMC9050938)
Supplement: NIHMS1782620-supplement-1.pdf [file NIHMS1782620-supplement-1.pdf]

Supplementary Table 1: Consolidated criteria for reporting qualitative research (COREQ)

| No. Item                                       | Guide questions/description                            | Answer                                                                                                                                                                                                                                                                                                                                                                                                                                                                                                                       |
|------------------------------------------------|--------------------------------------------------------|------------------------------------------------------------------------------------------------------------------------------------------------------------------------------------------------------------------------------------------------------------------------------------------------------------------------------------------------------------------------------------------------------------------------------------------------------------------------------------------------------------------------------|
| <b>Domain 1: Research team and reflexivity</b> |                                                        |                                                                                                                                                                                                                                                                                                                                                                                                                                                                                                                              |
| <i>Personal Characteristics</i>                |                                                        |                                                                                                                                                                                                                                                                                                                                                                                                                                                                                                                              |
| 1. Interviewer/facilitator                     | Which author/s conducted the interview or focus group? | Survivor surveys: n/a (Qualtrics survey)<br>Partner interviews: Erin Kennedy, MPH<br>Provider interviews: Erin Kennedy, MPH                                                                                                                                                                                                                                                                                                                                                                                                  |
| 2. Credentials                                 | What were the researcher's credentials? E.g. PhD, MD   | Kelly Shaffer: PhD, licensed clinical psychologist<br>Erin Kennedy: MPH<br>Jillian Glazer: BA<br>Anita H. Clayton: MD, board certified in Psychiatry and Neurology<br>Wendy Cohn: PhD, MEd<br>Jennifer Barsky Reese: PhD, licensed clinical psychologist<br>Trish Millard: MD, board certified in Internal Medicine, Hematology, Medical Oncology<br>Karen Ingersoll: PhD, licensed clinical psychologist<br>Lee Ritterband: PhD, licensed clinical psychologist<br>Shayna Showalter: MD, board certified in Surgery-General |
| 3. Occupation                                  | What was their occupation at the time of the study?    | Kelly Shaffer: Assistant Professor; Department of Psychiatry and Neurobehavioral Sciences, Center for Behavioral Health and Technology (Research)<br>Erin Kennedy: Research Coordinator; Department of Public Health Sciences (Research)<br>Jillian Glazer: Research Coordinator; Department of Psychiatry and Neurobehavioral Sciences, Center for Behavioral Health and Technology (Research)<br>Anita H. Clayton: Professor, Department of Psychiatry and Neurobehavioral Sciences; and Professor, Clinical               |

|                            |                                                      |                                                                                                                                                                                                                                                                                                                                                                                                                                                                                                                                                                                                                                                                                                                                                                                                                                                                                                              |
|----------------------------|------------------------------------------------------|--------------------------------------------------------------------------------------------------------------------------------------------------------------------------------------------------------------------------------------------------------------------------------------------------------------------------------------------------------------------------------------------------------------------------------------------------------------------------------------------------------------------------------------------------------------------------------------------------------------------------------------------------------------------------------------------------------------------------------------------------------------------------------------------------------------------------------------------------------------------------------------------------------------|
|                            |                                                      | <p>Obstetrics &amp; Gynecology (Research, Clinical, Education, &amp; Administration)</p> <p>Wendy Cohn: Associate Professor; Department of Public Health Sciences (Research, Administration)</p> <p>Jennifer Barsky Reese: Associate Professor; Cancer Control and Prevention (Research, Clinical)</p> <p>Trish Millard: Assistant Professor; Department of Medicine, Division of Hematology/Oncology, Breast Care Center (Research, Clinical)</p> <p>Karen S. Ingersoll: Professor, Department of Psychiatry and Neurobehavioral Sciences, Center for Behavioral Health and Technology (Research, Clinical)</p> <p>Lee Ritterband: Professor, Department of Psychiatry and Neurobehavioral Sciences, Center for Behavioral Health and Technology (Research)</p> <p>Shayna Showalter: Assistant Professor; Department of Surgery, Division of Surgical Oncology, Breast Care Center (Research, Clinical)</p> |
| 4. Gender                  | Was the researcher male or female?                   | <p>The following researchers identify as female: Kelly Shaffer, Erin Kennedy, Jillian Glazer, Anita H. Clayton, Wendy Cohn, Jennifer Barsky Reese, Trish Millard, Karen Ingersoll, Shayna Showalter</p> <p>The following researcher identifies as male: Lee Ritterband</p>                                                                                                                                                                                                                                                                                                                                                                                                                                                                                                                                                                                                                                   |
| 5. Experience and training | What experience or training did the researcher have? | <p>Kelly Shaffer: psycho-oncology, qualitative research methods</p> <p>Erin Kennedy: qualitative research methods; trained on the interview guides and had prior experience completing qualitative interviews</p> <p>Jillian Glazer: qualitative research methods</p> <p>Anita H. Clayton: women's mental health and sexual dysfunction</p>                                                                                                                                                                                                                                                                                                                                                                                                                                                                                                                                                                  |

|                                       |                                                             |                                                                                                                                                                                                                                                                                                                                                                                                                                                                                                                                                                                                                                                                                                                                                                                                                                                                                                                                                                                                                                                                                                                                                                                             |
|---------------------------------------|-------------------------------------------------------------|---------------------------------------------------------------------------------------------------------------------------------------------------------------------------------------------------------------------------------------------------------------------------------------------------------------------------------------------------------------------------------------------------------------------------------------------------------------------------------------------------------------------------------------------------------------------------------------------------------------------------------------------------------------------------------------------------------------------------------------------------------------------------------------------------------------------------------------------------------------------------------------------------------------------------------------------------------------------------------------------------------------------------------------------------------------------------------------------------------------------------------------------------------------------------------------------|
|                                       |                                                             | <p>Wendy Cohn: qualitative research methods<br/> Jennifer Barsky Reese: sexual health, psycho-oncology<br/> Trish Millard: medical breast oncology<br/> Karen Ingersoll: qualitative research methods<br/> Lee Ritterband: digital health, psycho-oncology<br/> Shayna Showalter: surgical breast oncology</p>                                                                                                                                                                                                                                                                                                                                                                                                                                                                                                                                                                                                                                                                                                                                                                                                                                                                              |
| <i>Relationship with participants</i> |                                                             |                                                                                                                                                                                                                                                                                                                                                                                                                                                                                                                                                                                                                                                                                                                                                                                                                                                                                                                                                                                                                                                                                                                                                                                             |
| 6. Relationship established           | Was a relationship established prior to study commencement? | <p>Survivor surveys: Survivors were recruited from UVA Breast Care Center and includes women treated by Drs. Millard and Showalter; however, participation was double-blind: survivors were not made aware that Drs. Millard and Showalter were involved in the research, and the identities of survivors enrolling or refusing were not known to Drs. Millard or Showalter.</p> <p>Partner interviews: Partners were recruited among survivors receiving care at the UVA Breast Care Center and includes partners of women treated by Drs. Millard and Showalter; however, participation was double-blind: partners were not made aware that Drs. Millard and Showalter were involved in the research, and the identities of partners enrolling or refusing were not known to Drs. Millard or Showalter.</p> <p>Provider interviews: Providers were recruited among the medical, surgical, and radiation oncologists and nurse practitioners of the UVA Breast Care Center. They were aware that Dr. Showalter, a member of the Breast Care Center team who was not interviewed, was part of the study team. Dr. Millard, a member of the Breast Care Center team who was interviewed,</p> |

|                                             |                                                                                                                                           |                                                                                                                                                                                                                                                                                                                                                                                                                                                                                                                                                                                                                                                                                                                                                                                                                                                                                                                                                               |
|---------------------------------------------|-------------------------------------------------------------------------------------------------------------------------------------------|---------------------------------------------------------------------------------------------------------------------------------------------------------------------------------------------------------------------------------------------------------------------------------------------------------------------------------------------------------------------------------------------------------------------------------------------------------------------------------------------------------------------------------------------------------------------------------------------------------------------------------------------------------------------------------------------------------------------------------------------------------------------------------------------------------------------------------------------------------------------------------------------------------------------------------------------------------------|
|                                             |                                                                                                                                           | joined the study team following data collection. They were aware that their comments would remain anonymized to all researchers with the exception of Dr. Shaffer and Ms. Kennedy, who had no formal relationships with the providers prior to the study.                                                                                                                                                                                                                                                                                                                                                                                                                                                                                                                                                                                                                                                                                                     |
| 7. Participant knowledge of the interviewer | What did the participants know about the researcher? e.g. personal goals, reasons for doing the research                                  | <p>Survivors: At recruitment and again at the start of their survey, survivors were informed that the study was assessing breast cancer survivors' experiences with sexual well-being following cancer, and that survivors did not need to be in a relationship to participate.</p> <p>Partners: At recruitment, partners were informed that the study was assessing the experiences with sexual well-being of romantic partners of breast cancer survivors. At the beginning of the interviews, partners were reminded the study was to learn about their unique experiences as the partner of someone who has been treated for breast cancer and their perceptions of your sexual relationship following your partner's cancer.</p> <p>Providers: The study was presented to the Breast Care Center clinical staff as a triadic study to assess survivors', partners', and providers' perceptions of women's sexual well-being following breast cancer.</p> |
| 8. Interviewer characteristics              | What characteristics were reported about the interviewer/facilitator? e.g. Bias, assumptions, reasons and interests in the research topic | The interviewer (Kennedy) was selected based on her experience in qualitative interviewing, expertise in cancer control and population health research, and comfort with addressing the topic of sexual health.                                                                                                                                                                                                                                                                                                                                                                                                                                                                                                                                                                                                                                                                                                                                               |
| <b>Domain 2: study design</b>               |                                                                                                                                           |                                                                                                                                                                                                                                                                                                                                                                                                                                                                                                                                                                                                                                                                                                                                                                                                                                                                                                                                                               |
| <i>Theoretical framework</i>                |                                                                                                                                           |                                                                                                                                                                                                                                                                                                                                                                                                                                                                                                                                                                                                                                                                                                                                                                                                                                                                                                                                                               |

|                                          |                                                                                                                                                          |                                                                                                                                                                                                                                                                                                                                                                                                                                                                                                                                                                                                                                                                                                                                                                                                                                          |
|------------------------------------------|----------------------------------------------------------------------------------------------------------------------------------------------------------|------------------------------------------------------------------------------------------------------------------------------------------------------------------------------------------------------------------------------------------------------------------------------------------------------------------------------------------------------------------------------------------------------------------------------------------------------------------------------------------------------------------------------------------------------------------------------------------------------------------------------------------------------------------------------------------------------------------------------------------------------------------------------------------------------------------------------------------|
| 9. Methodological orientation and Theory | What methodological orientation was stated to underpin the study? e.g. grounded theory, discourse analysis, ethnography, phenomenology, content analysis | Interpretive description methodological approach with thematic content analysis methods                                                                                                                                                                                                                                                                                                                                                                                                                                                                                                                                                                                                                                                                                                                                                  |
| <i>Participant selection</i>             |                                                                                                                                                          |                                                                                                                                                                                                                                                                                                                                                                                                                                                                                                                                                                                                                                                                                                                                                                                                                                          |
| 10. Sampling                             | How were participants selected? e.g. purposive, convenience, consecutive, snowball                                                                       | <p>Survivors: Convenience sample of survivors who met eligibility criteria and attended an appointment at the Breast Care Center during the period of recruitment.</p> <p>Partners: Convenience sample of partners of survivors who attended an appointment at the Breast Care Center during the period of recruitment and indicated their partners may be willing to participate.</p> <p>Providers: Convenience sample of providers at the Breast Care Center.</p>                                                                                                                                                                                                                                                                                                                                                                      |
| 11. Method of approach                   | How were participants approached? e.g. face-to-face, telephone, mail, email                                                                              | <p>Survivors: Survivors who were identified as meeting eligibility criteria per prior medical record review by the study team were approached by a Breast Care Center LPN at rooming, informed about the study, and provided study information. Interested survivors completed a tear-off card with their own, and if applicable, their partner's contact information. Survivors were then emailed a Qualtrics link to complete the survey by the study team.</p> <p>Partners: Partners who attended appointments with a survivor at the Breast Care Center were approached by a Breast Care Center LPN and informed about the study and provided study information. Interested partners completed a tear-off card with their own information. Survivors also could provide their partner's information if they believed the partner</p> |

|                       |                                                                 |                                                                                                                                                                                                                                                                                                                                                                                                                                                                                                                                                                                                                                                                                                                                                                                                                                                                                                                            |
|-----------------------|-----------------------------------------------------------------|----------------------------------------------------------------------------------------------------------------------------------------------------------------------------------------------------------------------------------------------------------------------------------------------------------------------------------------------------------------------------------------------------------------------------------------------------------------------------------------------------------------------------------------------------------------------------------------------------------------------------------------------------------------------------------------------------------------------------------------------------------------------------------------------------------------------------------------------------------------------------------------------------------------------------|
|                       |                                                                 | <p>would be interested. Partners were then contacted by phone and email by the study team to schedule a phone interview. Partners' significant other (i.e., the breast cancer survivor) did not need to enroll in order for the partner to participate.</p> <p>Providers: The study team presented the study to the Breast Care Center providers at a clinical team meeting. Individual providers were contacted after the presentation to determine willingness to participate and to schedule an interview.</p>                                                                                                                                                                                                                                                                                                                                                                                                          |
| 12. Sample size       | How many participants were in the study?                        | <p>Survivors: 29<br/>Partners: 12<br/>Providers: 8</p>                                                                                                                                                                                                                                                                                                                                                                                                                                                                                                                                                                                                                                                                                                                                                                                                                                                                     |
| 13. Non-participation | How many people refused to participate or dropped out? Reasons? | <p>Survivors: 146 survivors were identified as eligible per medical record review of women scheduled for a Breast Care Center surgical follow-up or survivorship appointment; 32 were not approached due to appointment cancellation/no-show (22%), 1 actively declined to participate (1%), 71 attended an appointment but did not complete a recruitment card for unknown reason (possibly including passive refusal, not approached, etc.; 49%), and 43 expressed interest by completing a recruitment card (29%). Of those expressing interest, 36 completed an online survey (84% of interested; 31% of total eligible survivors attending an appointment during the recruitment period). Of these, 29 were married/in a relationship and therefore completed items analyzed in the present study.</p> <p>Partners: Contact information was received for 16 partners; 1 declined upon contact (6%), 3 were unable</p> |

|                                  |                                                                                   |                                                                                                                                                                                                                                                                                                                                                                               |
|----------------------------------|-----------------------------------------------------------------------------------|-------------------------------------------------------------------------------------------------------------------------------------------------------------------------------------------------------------------------------------------------------------------------------------------------------------------------------------------------------------------------------|
|                                  |                                                                                   | <p>to be reached (19%), and 12 completed an interview (75%).</p> <p>Providers: All 8 providers emailed to determine willingness to participate completed an interview (100%).</p>                                                                                                                                                                                             |
| <i>Setting</i>                   |                                                                                   |                                                                                                                                                                                                                                                                                                                                                                               |
| 14. Setting of data collection   | Where was the data collected? e.g. home, clinic, workplace                        | <p>Survivors: Online surveys completed at survivors' convenience.</p> <p>Partners: Individual interviews conducted by phone.</p> <p>Providers: In-person individual interviews conducted in the providers' offices.</p>                                                                                                                                                       |
| 15. Presence of non-participants | Was anyone else present besides the participants and researchers?                 | <p>Survivors: It is unknown whether survivors completed online surveys in the presence of others.</p> <p>Partners: Individual phone interviews were conducted with only the partner and interviewer (Kennedy) on the call.</p> <p>Providers: In-person individual interviews were conducted with only the provider and interviewer (Kennedy) present in a private office.</p> |
| 16. Description of sample        | What are the important characteristics of the sample? e.g. demographic data, date | <p>Surveys and interviews were completed between October 2019 and April 2020.</p> <p>Demographic data for survivors and partners, and role information about healthcare providers, are listed in the first paragraph of the Results section</p>                                                                                                                               |
| <i>Data collection</i>           |                                                                                   |                                                                                                                                                                                                                                                                                                                                                                               |
| 17. Interview guide              | Were questions, prompts, guides provided by the authors? Was it pilot tested?     | <p>Complete survivor survey, partner interview guide, and provider interview guide are archived at: <a href="http://bit.ly/BrCaQual">http://bit.ly/BrCaQual</a>. Interview guides were collaboratively developed and reviewed by Shaffer,</p>                                                                                                                                 |

|                            |                                                                         |                                                                                                                                                                                                                                                                                                                                                                                                                                                                                                                                                                                                                                                                                                                   |
|----------------------------|-------------------------------------------------------------------------|-------------------------------------------------------------------------------------------------------------------------------------------------------------------------------------------------------------------------------------------------------------------------------------------------------------------------------------------------------------------------------------------------------------------------------------------------------------------------------------------------------------------------------------------------------------------------------------------------------------------------------------------------------------------------------------------------------------------|
|                            |                                                                         | Kennedy, Clayton, Cohn, and Showalter, but guides were not pilot tested.                                                                                                                                                                                                                                                                                                                                                                                                                                                                                                                                                                                                                                          |
| 18. Repeat interviews      | Were repeat interviews carried out? If yes, how many?                   | No repeat surveys or interviews were conducted.                                                                                                                                                                                                                                                                                                                                                                                                                                                                                                                                                                                                                                                                   |
| 19. Audio/visual recording | Did the research use audio or visual recording to collect the data?     | Survivor surveys were recorded in Qualtrics Highly Sensitive Data. Partner and provider interviews were audiorecorded.                                                                                                                                                                                                                                                                                                                                                                                                                                                                                                                                                                                            |
| 20. Field notes            | Were field notes made during and/or after the interview or focus group? | The interviewer kept field notes while completing partner and provider interviews.                                                                                                                                                                                                                                                                                                                                                                                                                                                                                                                                                                                                                                |
| 21. Duration               | What was the duration of the interviews or focus group?                 | <p>Survivor: Survivor survey duration for the complete study surveys ranged from 5 to 140 minutes, averaging 30 minutes. Survivors completed surveys 1 time, when survivors were between 6 months to 5 years post-treatment for breast cancer (average approximately 2 years post-treatment, range = 6 – 60 months).</p> <p>Partner: Duration of interviews ranged from 20 to 80 minutes, averaging 30 minutes. Partners completed interviews 1 time – there was no restriction on time since treatment for their partner (the survivor; on average approximately 2 years post-treatment, range = 9 – 60 months).</p> <p>Provider: Duration of interviews ranged from 10 to 25 minutes, averaging 15 minutes.</p> |
| 22. Data saturation        | Was data saturation discussed?                                          | <p>Survivor: N/A – survivors completed open-ended survey responses.</p> <p>Partner: Partner sample was recruited to reach thematic saturation for themes generated across the full interview guide.</p> <p>Provider: N/A – sample of providers from the target clinic was a convenience sample.</p>                                                                                                                                                                                                                                                                                                                                                                                                               |



|                                        |                                                                                                                                 |                                                                                                                                                                                                                                                                                           |
|----------------------------------------|---------------------------------------------------------------------------------------------------------------------------------|-------------------------------------------------------------------------------------------------------------------------------------------------------------------------------------------------------------------------------------------------------------------------------------------|
| 23. Transcripts returned               | Were transcripts returned to participants for comment and/or correction?                                                        | No                                                                                                                                                                                                                                                                                        |
| <b>Domain 3: analysis and findings</b> |                                                                                                                                 |                                                                                                                                                                                                                                                                                           |
| <i>Data analysis</i>                   |                                                                                                                                 |                                                                                                                                                                                                                                                                                           |
| 24. Number of data coders              | How many data coders coded the data?                                                                                            | Each interview was separately coded by 2 of the 3 coders of Shaffer, Kennedy, and Glazer; all coded interviews were reviewed together by the 3 coders for consensus.                                                                                                                      |
| 25. Description of the coding tree     | Did authors provide a description of the coding tree?                                                                           | Survivors: N/A – frequencies of select items.<br>Partners: See Table 2 for description of partner data.<br>Providers: See Table 3 for themes and representative quotes.<br>See Figure 1 for coding tree as part of the broader concept map.                                               |
| 26. Derivation of themes               | Were themes identified in advance or derived from the data?                                                                     | Themes were derived from the partner and provider data.                                                                                                                                                                                                                                   |
| 27. Software                           | What software, if applicable, was used to manage the data?                                                                      | Survivor survey data was exported from Qualtrics and coded by hand in Excel.<br><br>Partner and provider interviews were transcribed using Trint, then transcripts were manually reviewed and imported into, and coded within, Dedoose.                                                   |
| 28. Participant checking               | Did participants provide feedback on the findings?                                                                              | No                                                                                                                                                                                                                                                                                        |
| <i>Reporting</i>                       |                                                                                                                                 |                                                                                                                                                                                                                                                                                           |
| 29. Quotations presented               | Were participant quotations presented to illustrate the themes/findings? Was each quotation identified? e.g. participant number | Exemplary partner quotes are included in-text and in Table 2. Exemplary provider quotes are included in-text and in Table 3. Provider quotes are not identified, given the relatively small number of participating physicians from a single clinic means anonymity would be compromised. |

|                                  |                                                                        |                                                                                 |
|----------------------------------|------------------------------------------------------------------------|---------------------------------------------------------------------------------|
| 30. Data and findings consistent | Was there consistency between the data presented and the findings?     | We aim to discuss data representatively in our Results and Discussion sections. |
| 31. Clarity of major themes      | Were major themes clearly presented in the findings?                   | We aim to discuss data comprehensively in our Results and Discussion sections.  |
| 32. Clarity of minor themes      | Is there a description of diverse cases or discussion of minor themes? | We discuss discrepant findings in our Results and Discussion sections.          |
